# Supplementary material
Source: PubMed Central journal article supplement (PMC6384444)
Supplement: SupplementalMaterial.pdf [file SupplementalMaterial.pdf]

**Enriched environment on the intestinal mucosal barrier and brain-gut axis in rats with colorectal cancer**

**Short title:** Enriched environment on intestinal mucosal barrier and the brain-gut axis in rats with colorectal cancer

**Dun Liu<sup>1</sup>, Xiao-Ying Jiang<sup>1</sup>, Lan-Shu Zhou<sup>2</sup>**

From Nursing School, Fujian Medical University, Fuzhou, Fujian, China.

1 [Fujian Medical University, Fuzhou, Fujian, China.](#)

2 [The Second Military Medical University, Shanghai, China.](#)

Correspondence: Xiao-Ying Jiang, Nursing School, Fujian Medical University, Fuzhou, Fujian, China.

E-mail: [jiangxy320@126.com](mailto:jiangxy320@126.com)

Author to whom correspondence is to be sent: Dun Liu, Nursing School, Fujian Medical University, Fuzhou, Fujian, China. E-mail: [liudun2005@163.com](mailto:liudun2005@163.com)

**Abbreviated running title:** Enriched environment on the intestinal mucosal barrier of colorectal cancer

**Table S1 Variance analysis of intestinal villus length based on enlarged space, social support and cognitive stimulation**

| <b>Variation</b> | <b>SS</b>   | <b>MS</b> | <b>df</b> | <b>F</b> | <b>P</b> |
|------------------|-------------|-----------|-----------|----------|----------|
| Cognition        | 171.319     | 171.319   | 1         | 0.581    | 0.449    |
| Social support   | 713.614     | 713.614   | 1         | 2.420    | 0.125    |
| Enlarged space   | 318.297     | 318.297   | 1         | 1.080    | 0.303    |
| C*S              | 0.792       | 0.792     | 1         | 0.003    | 0.959    |
| C*E              | 695.874     | 695.874   | 1         | 2.345    | 0.131    |
| S*E              | 68.996      | 68.996    | 1         | 0.232    | 0.632    |
| C*S*E            | 64.808      | 64.808    | 1         | 0.215    | 0.644    |
| Bias             | 17394.630   | 294.824   | 55        |          |          |
| Total            | 2436585.964 |           |           |          |          |

Note: SS is stdev square, MS is mean square, df is degree freedom. C is cognition, S is social support, E is enlarged space. C\*S is the interaction of cognition and social support factors. C\*E is the interaction of cognition and enlarged space factors. S\*E is the interaction of social support and enlarged space factors. C\*S\*E is the interaction of cognition, social support and enlarged space factors.

**Table S2 Variance analysis of intestinal villus width based on enlarged space, social support, and cognitive stimulation**

| <b>Variation</b> | <b>SS</b>   | <b>MS</b> | <b>df</b> | <b>F</b> | <b>P</b> |
|------------------|-------------|-----------|-----------|----------|----------|
| Cognition        | 335.882     | 335.882   | 1         | 0.736    | 0.394    |
| Social support   | 1.339       | 1.339     | 1         | 0.003    | 0.957    |
| Enlarged space   | 2093.243    | 2093.243  | 1         | 4.590    | 0.036    |
| C*S              | 1.023       | 1.023     | 1         | 0.002    | 0.962    |
| C*E              | 753.929     | 753.929   | 1         | 1.664    | 0.202    |
| S*E              | 804.227     | 804.227   | 1         | 1.775    | 0.188    |
| C*S*E            | 439.474     | 439.474   | 1         | 0.969    | 0.329    |
| Bias             | 26907.075   | 456.052   | 55        |          |          |
| Total            | 2200151.568 |           |           |          |          |

Note: SS is stdev square, MS is mean square, df is degree freedom. C is cognition, S is social support, E is enlarged space. C\*S is the interaction of cognition and social support factors. C\*E is the interaction of cognition and enlarged space factors. S\*E is the interaction of social support and enlarged space factors. C\*S\*E is the interaction of cognition, social support and enlarged space factors.

**Table S3 Variance analysis of muscle layer thickness based on enlarged space, social support, and cognitive stimulation**

| Variation      | SS          | MS       | df | F      | P     |
|----------------|-------------|----------|----|--------|-------|
| Cognition      | 73.893      | 73.893   | 1  | 0.341  | 0.561 |
| Social support | 263.812     | 263.812  | 1  | 1.218  | 0.274 |
| Enlarged space | 651.954     | 651.954  | 1  | 3.010  | 0.088 |
| C*S            | 30.429      | 30.429   | 1  | 0.141  | 0.709 |
| C*E            | 3100.261    | 3100.261 | 1  | 14.312 | 0.000 |
| S*E            | 416.018     | 416.018  | 1  | 1.922  | 0.171 |
| C*S*E          | 65.113      | 65.113   | 1  | 0.297  | 0.588 |
| Bias           | 12563.542   | 216.613  | 58 |        |       |
| Total          | 2919011.063 |          | 63 |        |       |

Note: SS is stdev square, MS is mean square, df is degree freedom. C is cognition, S is social support, E is enlarged space. C\*S is the interaction of cognition and social support factors. C\*E is the interaction of cognition and enlarged space factors. S\*E is the interaction of social support and enlarged space factors. C\*S\*E is the interaction of cognition, social support and enlarged space factors.

**Table S4 Microscopic morphology of intestinal mucosa in eight groups of rats ( $\mu\text{m}$ ,  $\bar{x}\pm s$ )**

| Cognition | Social support | Enlarged space | Intestinal villi                   | Villi width                        | Muscularis thickness                |
|-----------|----------------|----------------|------------------------------------|------------------------------------|-------------------------------------|
| No        | No             | No             | 201.110 $\pm$ 11.992 <sup>ab</sup> | 198.359 $\pm$ 14.695 <sup>ab</sup> | 232.909 $\pm$ 9.880 <sup>ab</sup>   |
| No        | Yes            | No             | 198.760 $\pm$ 21.406 <sup>ab</sup> | 196.571 $\pm$ 39.910 <sup>ab</sup> | 220.026 $\pm$ 9.303 <sup>cd</sup>   |
| No        | No             | Yes            | 194.120 $\pm$ 22.579 <sup>ab</sup> | 178.077 $\pm$ 17.036 <sup>bc</sup> | 204.927 $\pm$ 20.282 <sup>fg</sup>  |
| No        | Yes            | Yes            | 183.449 $\pm$ 22.099 <sup>cd</sup> | 179.832 $\pm$ 17.878 <sup>bc</sup> | 206.473 $\pm$ 13.330 <sup>ef</sup>  |
| Yes       | No             | No             | 200.046 $\pm$ 10.138 <sup>ab</sup> | 191.887 $\pm$ 11.763 <sup>bc</sup> | 212.949 $\pm$ 13.920 <sup>de</sup>  |
| Yes       | Yes            | No             | 193.116 $\pm$ 21.396 <sup>bc</sup> | 179.848 $\pm$ 20.043 <sup>bc</sup> | 206.991 $\pm$ 21.304 <sup>cdf</sup> |
| Yes       | No             | Yes            | 202.229 $\pm$ 10.342 <sup>ab</sup> | 174.693 $\pm$ 18.014 <sup>cd</sup> | 217.405 $\pm$ 9.965 <sup>cd</sup>   |
| Yes       | Yes            | Yes            | 195.099 $\pm$ 10.859 <sup>ab</sup> | 187.347 $\pm$ 17.604 <sup>bc</sup> | 217.735 $\pm$ 14.699 <sup>bcf</sup> |

Note: There is no significant difference in the right superscript with one same letter or two same letters between the two groups. There is significant difference in the right superscript with all letter differences.

**Table S5 Analysis of variance of occludin based on enlarged space, social support, and cognitive stimulation**

| Variation | SS | MS | df | F | P |
|-----------|----|----|----|---|---|
|-----------|----|----|----|---|---|

|                |         |        |    |        |       |
|----------------|---------|--------|----|--------|-------|
| Cognition      | 6.250   | 6.250  | 1  | 7.520  | 0.008 |
| Social support | 10.523  | 10.523 | 1  | 12.661 | 0.001 |
| Enlarged space | 0.052   | 0.052  | 1  | 0.062  | 0.804 |
| C*S            | 0.237   | 0.237  | 1  | 0.274  | 0.603 |
| C*E            | 0.237   | 0.237  | 1  | 0.274  | 0.603 |
| S*E            | 0.066   | 0.066  | 1  | 0.076  | 0.784 |
| C*S*E          | 2.317   | 2.317  | 1  | 2.760  | 0.102 |
| Bias           | 49.036  | 0.831  | 55 |        |       |
| Total          | 855.000 |        | 63 |        |       |

Note: SS is stdev square, MS is mean square, df is degree freedom. C is cognition, S is social support, E is enlarged space. C\*S is the interaction of cognition and social support factors. C\*E is the interaction of cognition and enlarged space factors. S\*E is the interaction of social support and enlarged space factors. C\*S\*E is the interaction of cognition, social support and enlarged space factors.

**Table S6 Occludin level in eight groups of colorectal cancer rats ( $\bar{x}\pm s$ )**

| Cognition | Social support | Enlarged space | Occludin                   |
|-----------|----------------|----------------|----------------------------|
| No        | No             | No             | 2.714±0.756 <sup>de</sup>  |
| No        | Yes            | No             | 3.875±0.835 <sup>bc</sup>  |
| No        | No             | Yes            | 3.000±0.756 <sup>cde</sup> |
| No        | Yes            | Yes            | 3.250±0.886 <sup>cd</sup>  |
| Yes       | No             | No             | 3.500±0.756 <sup>cd</sup>  |
| Yes       | Yes            | No             | 4.125±1.246 <sup>abd</sup> |
| Yes       | No             | Yes            | 3.250±0.707 <sup>de</sup>  |
| Yes       | Yes            | Yes            | 4.500±1.195 <sup>ab</sup>  |

Note: There is one or two identical letters in the right sign, which is not statistically significant. The alphabet of the right label is completely different, and there is a statistical significance for the difference.

**Table S7 Variance analysis of plasma IL-10 level based on enlarged space, social support, and cognitive stimulation**

| Variation      | SS         | MS         | df | F       | P     |
|----------------|------------|------------|----|---------|-------|
| cognition      | 187968.974 | 187968.974 | 1  | 398.299 | 0.000 |
| social support | 177827.509 | 177827.509 | 1  | 376.810 | 0.000 |
| enlarged space | 27024.789  | 27024.789  | 1  | 57.265  | 0.000 |
| C*S            | 88754.994  | 88754.994  | 1  | 188.069 | 0.000 |

|       |             |           |    |        |       |
|-------|-------------|-----------|----|--------|-------|
| C*E   | 35709.177   | 35709.177 | 1  | 75.666 | 0.000 |
| S*E   | 25547.066   | 25547.066 | 1  | 54.133 | 0.000 |
| C*S*E | 3263.151    | 3263.151  | 1  | 6.914  | 0.011 |
| Bias  | 25956.095   | 471.929   | 55 |        |       |
| Total | 1245710.280 |           |    |        |       |

Note: SS is stdev square, MS is mean square, df is degree freedom. C is cognition, S is social support, E is enlarged space. C\*S is the interaction of cognition and social support factors. C\*E is the interaction of cognition and enlarged space factors. S\*E is the interaction of social support and enlarged space factors. C\*S\*E is the interaction of cognition, social support and enlarged space factors.

**Table S8 Variance analysis of plasma IL-6 level based on enlarged space, social support, and cognition simulation**

| Variation      | SS          | MS        | df | F       | P     |
|----------------|-------------|-----------|----|---------|-------|
| Cognition      | 11753.962   | 11753.962 | 1  | 37.305  | 0.000 |
| Social support | 15009.914   | 15009.914 | 1  | 47.639  | 0.000 |
| Enlarged space | 2854.897    | 2854.897  | 1  | 9.061   | 0.004 |
| C*S            | 50264.140   | 50264.140 | 1  | 159.530 | 0.000 |
| C*E            | 250.569     | 250.569   | 1  | 0.785   | 0.379 |
| S*E            | 161.213     | 161.213   | 1  | 0.505   | 0.480 |
| C*S*E          | 1076.659    | 1076.659  | 1  | 3.526   | 0.066 |
| Bias           | 18274.467   | 315.077   | 58 |         |       |
| Total          | 3762488.228 |           | 63 |         |       |

Note: SS is stdev square, MS is mean square, df is degree freedom. C is cognition, S is social support, E is enlarged space. C\*S is the interaction of cognition and social support factors. C\*E is the interaction of cognition and enlarged space factors. S\*E is the interaction of social support and enlarged space factors. C\*S\*E is the interaction of cognition, social support and enlarged space factors.

**Table S9 Variance analysis of plasma TNF- $\alpha$  based on enlarged space, social support, and cognition**

| Variation      | SS       | MS       | df | F       | P     |
|----------------|----------|----------|----|---------|-------|
| Cognition      | 9685.064 | 9685.064 | 1  | 172.524 | 0.000 |
| Social support | 8045.435 | 8045.435 | 1  | 143.317 | 0.000 |
| Enlarged space | 6346.036 | 6346.036 | 1  | 9.310   | 0.000 |
| C*S            | 538.452  | 538.452  | 1  | 113.045 | 0.003 |

|        |            |          |    |         |       |
|--------|------------|----------|----|---------|-------|
| C*E    | 8009.906   | 8009.906 | 1  | 142.684 | 0.000 |
| S*E    | 2560.892   | 2560.892 | 1  | 45.618  | 0.000 |
| C*S* E | 31.752     | 31.752   | 1  | 0.561   | 0.457 |
| Bias   | 3143.692   | 56.137   | 56 |         |       |
| Total  | 800163.976 |          | 63 |         |       |

Note: SS is stdev square, MS is mean square, df is degree freedom. C is cognition, S is social support, E is enlarged space. C\*S is the interaction of cognition and social support factors. C\*E is the interaction of cognition and enlarged space factors. S\*E is the interaction of social support and enlarged space factors. C\*S\*E is the interaction of cognition, social support and enlarged space factors.

**Table S10 Plasma cytokines level in eight groups of colorectal cancer rats (0. 1pg/ml,  $\bar{x}\pm s$ )**

| Cognition | Social support | Enlarged space | Plasma IL-10                      | Plasma IL-6                         | Plasma TNF- $\alpha$               |
|-----------|----------------|----------------|-----------------------------------|-------------------------------------|------------------------------------|
| No        | No             | No             | 15.531 $\pm$ 12.010 <sup>a</sup>  | 235.893 $\pm$ 9.629 <sup>d</sup>    | 144.020 $\pm$ 5.575 <sup>a</sup>   |
| No        | Yes            | No             | 72.657 $\pm$ 5.631 <sup>b</sup>   | 257.052 $\pm$ 32.726 <sup>bcd</sup> | 104.283 $\pm$ 6.009 <sup>f</sup>   |
| No        | No             | Yes            | 47.636 $\pm$ 10.249 <sup>c</sup>  | 247.968 $\pm$ 7.506 <sup>bcd</sup>  | 130.274 $\pm$ 13.864 <sup>b</sup>  |
| No        | Yes            | Yes            | 52.949 $\pm$ 21.079 <sup>c</sup>  | 277.986 $\pm$ 8.897 <sup>bc</sup>   | 113.168 $\pm$ 4.794 <sup>bde</sup> |
| Yes       | No             | No             | 82.996 $\pm$ 8.88 <sup>b</sup>    | 259.817 $\pm$ 13.083 <sup>ab</sup>  | 92.279 $\pm$ 3.427 <sup>e</sup>    |
| Yes       | Yes            | No             | 319.220 $\pm$ 43.224 <sup>d</sup> | 184.530 $\pm$ 9.223 <sup>e</sup>    | 61.350 $\pm$ 1.687 <sup>g</sup>    |
| Yes       | No             | Yes            | 48.592 $\pm$ 15.478 <sup>c</sup>  | 282.330 $\pm$ 13.767 <sup>ab</sup>  | 120.778 $\pm$ 10.247 <sup>bc</sup> |
| Yes       | Yes            | Yes            | 175.373 $\pm$ 28.575 <sup>f</sup> | 182.798 $\pm$ 25.833 <sup>e</sup>   | 118.168 $\pm$ 6.859 <sup>cd</sup>  |

Note: There is no significant difference in the right superscript with one same letter or two same letters between the two groups. There is significant difference in the right superscript with all letter differences.

**Table S11 Variance analysis of IL-10 level in intestinal mucosa based on enlarged space, social support, and cognition**

| Variation      | SS         | MS         | df | F       | P     |
|----------------|------------|------------|----|---------|-------|
| Cognition      | 114833.162 | 114833.162 | 1  | 99.787  | 0.000 |
| Social support | 163688.289 | 163688.289 | 1  | 142.241 | 0.000 |
| Enlarged space | 40150.947  | 40150.947  | 1  | 34.890  | 0.000 |
| C*S            | 257693.097 | 257693.097 | 1  | 223.929 | 0.000 |
| C*E            | 280.419    | 280.419    | 1  | 0.240   | 0.626 |
| S*E            | 34487.790  | 34487.790  | 1  | 29.969  | 0.000 |
| C*S*E          | 8.282      | 8.282      | 1  | 0.007   | 0.934 |
| Bias           | 65594.397  | 1150.779   | 55 |         |       |

Total 24595017.75 63

Note: SS is stdev square, MS is mean square, df is degree freedom. C is cognition, S is social support, E is enlarged space. C\*S is the interaction of cognition and social support factors. C\*E is the interaction of cognition and enlarged space factors. S\*E is the interaction of social support and enlarged space factors. C\*S\*E is the interaction of cognition, social support and enlarged space factors.

**Table S12 Variance analysis of IL-6 level in intestinal mucosa based on enlarged space, social support, and cognition**

| Variation      | SS          | MS          | df | F         | P     |
|----------------|-------------|-------------|----|-----------|-------|
| Cognition      | 25264402.41 | 25264402.41 | 1  | 11673.269 | 0.000 |
| Social support | 524281.491  | 524281.491  | 1  | 242.241   | 0.000 |
| Enlarged space | 74397.066   | 74397.066   | 1  | 34.375    | 0.000 |
| C*S            | 816352.196  | 816352.196  | 1  | 377.191   | 0.000 |
| C*E            | 13620.791   | 13620.791   | 1  | 6.293     | 0.015 |
| S*E            | 77841.013   | 77841.013   | 1  | 35.966    | 0.000 |
| C*S*E          | 26955.975   | 26955.975   | 1  | 12.455    | 0.001 |
| Bias           | 119036.243  | 2164.295    | 55 |           |       |
| Total          | 27279066.55 |             | 63 |           |       |

Note: SS is stdev square, MS is mean square, df is degree freedom. C is cognition, S is social support, E is enlarged space. C\*S is the interaction of cognition and social support factors. C\*E is the interaction of cognition and enlarged space factors. S\*E is the interaction of social support and enlarged space factors. C\*S\*E is the interaction of cognition, social support and enlarged space factors.

**Table S13 Variance analysis of the level of TNF- $\alpha$  in the intestinal mucosa based on enlarged space, social support, and cognition**

| Variation      | SS        | MS        | df | F       | P     |
|----------------|-----------|-----------|----|---------|-------|
| Cognition      | 63721.562 | 63721.562 | 1  | 351.579 | 0.000 |
| Social support | 37031.081 | 37031.081 | 1  | 204.316 | 0.000 |
| Enlarged space | 33888.557 | 33888.557 | 1  | 186.978 | 0.000 |
| C*S            | 2369.945  | 2369.945  | 1  | 13.076  | 0.001 |
| C*E            | 10790.318 | 10790.318 | 1  | 59.535  | 0.000 |
| S*E            | 43901.698 | 43901.698 | 1  | 242.225 | 0.000 |

|       |             |           |    |        |       |
|-------|-------------|-----------|----|--------|-------|
| C*S*E | 11200.847   | 11200.847 | 1  | 61.800 | 0.000 |
| Bias  | 9968.410    | 181.244   | 55 |        |       |
| Total | 4179460.763 |           | 63 |        |       |

Note: SS is stdev square, MS is mean square, df is degree freedom. C is cognition, S is social support, E is enlarged space. C\*S is the interaction of cognition and social support factors. C\*E is the interaction of cognition and enlarged space factors. S\*E is the interaction of social support and enlarged space factors. C\*S\*E is the interaction of cognition, social support and enlarged space factors.

**Table S14 Cytokines levels in the intestinal mucosa in eight groups of rats with colorectal cancer (0.01 pg/ml,  $\bar{x}\pm s$ )**

| Cognition | Social support | Enlarged space | Intestinal mucosal IL-10           | Intestinal mucosal IL-6           | Intestinal mucosal TNF- $\alpha$  |
|-----------|----------------|----------------|------------------------------------|-----------------------------------|-----------------------------------|
| No        | No             | No             | 585.794 $\pm$ 24.291 <sup>b</sup>  | 611.023 $\pm$ 34.438 <sup>c</sup> | 611.023 $\pm$ 34.438 <sup>d</sup> |
| No        | Yes            | No             | 606.090 $\pm$ 4.447 <sup>b</sup>   | 685.244 $\pm$ 82.659 <sup>b</sup> | 267.575 $\pm$ 13.453 <sup>b</sup> |
| No        | No             | Yes            | 585.700 $\pm$ 10.96 <sup>b</sup>   | 738.215 $\pm$ 44.489 <sup>b</sup> | 376.464 $\pm$ 9.515 <sup>c</sup>  |
| No        | Yes            | Yes            | 513.676 $\pm$ 6.51 <sup>c</sup>    | 754.517 $\pm$ 30.851 <sup>b</sup> | 260.665 $\pm$ 13.766 <sup>b</sup> |
| Yes       | No             | No             | 546.845 $\pm$ 8.792 <sup>c</sup>   | 700.201 $\pm$ 45.962 <sup>b</sup> | 700.201 $\pm$ 45.962 <sup>c</sup> |
| Yes       | Yes            | No             | 824.469 $\pm$ 61.249 <sup>a</sup>  | 401.466 $\pm$ 48.049 <sup>d</sup> | 191.134 $\pm$ 8.317 <sup>a</sup>  |
| Yes       | No             | Yes            | 539.782 $\pm$ 49.659 <sup>bc</sup> | 851.341 $\pm$ 36.479 <sup>a</sup> | 272.180 $\pm$ 20.814 <sup>b</sup> |
| Yes       | Yes            | Yes            | 722.183 $\pm$ 48.441 <sup>a</sup>  | 329.044 $\pm$ 21.750 <sup>c</sup> | 185.211 $\pm$ 12.180 <sup>a</sup> |

Note: There is no significant difference in the right superscript with one same letter or two same letters between the two groups. There is significant difference in the right superscript with all letter differences.

**Table S15 Variance analysis of the SIgA level in the intestinal mucosa based on enlarged space, social support, and cognitive simulation**

| Variation      | SS      | MS     | df | F      | P     |
|----------------|---------|--------|----|--------|-------|
| Cognition      | 12.046  | 12.046 | 1  | 14.709 | 0.000 |
| Social support | 8.850   | 8.850  | 1  | 10.806 | 0.02  |
| Enlarged space | 0.000   | 0.000  | 1  | 0.000  | 1.000 |
| C*S            | 0.966   | 0.966  | 1  | 1.222  | 0.274 |
| C*E            | 8.850   | 8.850  | 1  | 10.806 | 0.002 |
| S*E            | 2.237   | 2.237  | 1  | 2.831  | 0.098 |
| C*S*E          | 2.317   | 2.317  | 1  | 3.039  | 0.087 |
| Bias           | 47.500  | 0.819  | 55 |        |       |
| Total          | 724.000 |        | 63 |        |       |



Note: SS is stdev square, MS is mean square, df is degree freedom. C is cognition, S is social support, E is enlarged space. C\*S is the interaction of cognition and social support factors. C\*E is the interaction of cognition and enlarged space factors. S\*E is the interaction of social support and enlarged space factors. C\*S\*E is the interaction of cognition, social support and enlarged space factors.

**Table S16 SIgA level in eight groups of rats with colorectal cancer (  $\bar{x} \pm s$  )**

| Cognition | Social support | Enlarged space | SIgA                      |
|-----------|----------------|----------------|---------------------------|
| No        | No             | No             | 1.714±0.951 <sup>e</sup>  |
| No        | Yes            | No             | 3.000±0.926 <sup>bc</sup> |
| No        | No             | Yes            | 3.250±1.165 <sup>bc</sup> |
| No        | Yes            | Yes            | 3.000±0.756 <sup>bc</sup> |
| Yes       | No             | No             | 3.500±0.535 <sup>bc</sup> |
| Yes       | Yes            | No             | 4.500±0.756 <sup>a</sup>  |
| Yes       | No             | Yes            | 2.750±1.035 <sup>cd</sup> |
| Yes       | Yes            | Yes            | 3.75±0.707 <sup>ab</sup>  |

Note: There is no significant difference in the right superscript with one same letter or two same letters between the two groups. There is significant difference in the right superscript with all letter differences.

**Table S17 Variance analysis of CRF levels in the hypothalamus based on enlarged space, social support, and cognitive stimulation**

| Variation      | SS         | MS         | df | F       | P     |
|----------------|------------|------------|----|---------|-------|
| Cognition      | 121537.698 | 121537.698 | 1  | 221.197 | 0.000 |
| Social support | 19270.448  | 19270.448  | 1  | 35.072  | 0.000 |
| Enlarged space | 14499.563  | 14499.563  | 1  | 26.389  | 0.000 |
| C*S            | 31587.652  | 31587.652  | 1  | 57.489  | 0.000 |
| C*E            | 6.912      | 6.912      | 1  | 0.013   | 0.911 |
| S*E            | 11962.188  | 11962.188  | 1  | 21.771  | 0.000 |
| C*S*E          | 10839.627  | 10839.627  | 1  | 19.728  | 0.000 |
| Bias           | 30219.980  | 549.454    | 55 |         |       |
| Total          | 947944.477 |            | 63 |         |       |

Note: SS is stdev square, MS is mean square, df is degree freedom. C is cognition, S is social support, E is enlarged space. C\*S is the interaction of cognition and social support factors. C\*E is the interaction of cognition and enlarged space factors. S\*E is the interaction of social support and enlarged space factors.

C\*S\*E is the interaction of cognition, social support and enlarged space factors.

**Table S18 CRF levels in the hypothalamus of rats with colorectal cancer (pg/g,  $\bar{x} \pm s$ )**

| Cognition | Social support | Enlarged space | Hypothalamus CRF            |
|-----------|----------------|----------------|-----------------------------|
| No        | No             | No             | 49.848±16.843 <sup>de</sup> |
| No        | Yes            | No             | 41.360±27.504 <sup>e</sup>  |
| No        | No             | Yes            | 82.209±15.375 <sup>bc</sup> |
| No        | Yes            | Yes            | 71.068±19.448 <sup>cd</sup> |
| Yes       | No             | No             | 67.355±24.792 <sup>cd</sup> |
| Yes       | Yes            | No             | 201.041±27.216 <sup>a</sup> |
| Yes       | No             | Yes            | 150.908±15.755 <sup>a</sup> |
| Yes       | Yes            | Yes            | 176.903±33.155 <sup>a</sup> |

Note: There is no significant difference in the right superscript with one same letter or two same letters between the two groups. There is significant difference in the right superscript with all letter differences.

**Table S19 Variance analysis of intestinal mucosal ghrelin by enlarged space, social support, and cognitive stimulation**

| Variation      | SS          | MS          | df | F       | P     |
|----------------|-------------|-------------|----|---------|-------|
| Cognition      | 219307143.6 | 219307143.6 | 1  | 153.017 | 0.000 |
| Social support | 32744658.59 | 32744658.59 | 1  | 22.847  | 0.000 |
| Enlarged space | 429139.762  | 429139.762  | 1  | 0.299   | 0.586 |
| C*S            | 40211093.43 | 40211093.43 | 1  | 28.056  | 0.000 |
| C* E           | 22667295.17 | 22667295.17 | 1  | 15.816  | 0.000 |
| S*E            | 224979921.7 | 224979921.7 | 1  | 156.975 | 0.000 |
| C*S* E         | 73414857.01 | 73414857.01 | 1  | 51.224  | 0.000 |
| Bias           | 78827268.55 | 1433223.065 | 55 |         |       |
| Total          | 3.931E+10   |             | 63 |         |       |

Note: SS is stdev square, MS is mean square, df is degree freedom. C is cognition, S is social support, E is enlarged space. C\*S is the interaction of cognition and social support factors. C\*E is the interaction of cognition and enlarged space factors. S\*E is the interaction of social support and enlarged space factors. C\*S\*E is the interaction of cognition, social support and enlarged space factors.

**Table S20 Variance analysis of ghrelin level in the hypothalamus by enlarged space, social support, and cognition**

| Variation      | SS          | MS          | df | F      | P     |
|----------------|-------------|-------------|----|--------|-------|
| Cognition      | 235442289.9 | 235442289.9 | 1  | 28.149 | 0.000 |
| Social support | 207031266.6 | 207031266.6 | 1  | 24.752 | 0.000 |
| Enlarged space | 53329777.92 | 53329777.92 | 1  | 6.376  | 0.014 |
| C*S            | 93253153.84 | 93253153.84 | 1  | 11.149 | 0.001 |
| C*E            | 112672393.7 | 112672393.7 | 1  | 13.471 | 0.001 |
| S*E            | 183872.158  | 183872.158  | 1  | 0.022  | 0.884 |
| C*S*E          | 21779208.09 | 21779208.09 | 1  | 2.634  | 0.110 |
| Bias           | 476580074.9 | 476580074.9 | 55 |        |       |
| Total          | 1.931E+10   |             | 63 |        |       |

Note: SS is stdev square, MS is mean square, df is degree freedom. C is cognition, S is social support, E is enlarged space. C\*S is the interaction of cognition and social support factors. C\*E is the interaction of cognition and enlarged space factors. S\*E is the interaction of social support and enlarged space factors. C\*S\*E is the interaction of cognition, social support and enlarged space factors.

**Table S21 Intestinal and hypothalamic ghrelin secretion(  $\bar{x} \pm s$  )**

| Cognition | Social support | Enlarged space | Intestinal mucosa Ghrelin        | Hypothalamus Ghrelin              |
|-----------|----------------|----------------|----------------------------------|-----------------------------------|
| No        | No             | No             | 20448.714±859.189 <sup>h</sup>   | 14567.429±1654.631 <sup>cd</sup>  |
| No        | Yes            | No             | 26236.875±1269.350 <sup>de</sup> | 14633.375±2783.172 <sup>cd</sup>  |
| No        | No             | Yes            | 25357.375±762.349 <sup>ef</sup>  | 14275.375±2485.560 <sup>d</sup>   |
| No        | Yes            | Yes            | 19257.000±1479.306 <sup>h</sup>  | 16520.500±3246.074 <sup>bcd</sup> |
| Yes       | No             | No             | 23544.750±1153.422 <sup>g</sup>  | 17444.500±3824.842 <sup>bc</sup>  |
| Yes       | Yes            | No             | 28209.500±749.865 <sup>ab</sup>  | 24772.000±3409.338 <sup>a</sup>   |
| Yes       | No             | Yes            | 26532.875±665.471 <sup>cd</sup>  | 14191.250±2321.198 <sup>d</sup>   |
| Yes       | Yes            | Yes            | 27953.500±1977.875 <sup>bc</sup> | 18989.625±253.985 <sup>b</sup>    |

Note: There is one or two identical letters in the right sign, which is not statistically significant. The alphabet of the right label is completely different, and there is a statistical significance for the difference.
